# Supplementary figures and images for: Thalamic input to auditory cortex is locally heterogeneous but globally tonotopic
Source: eLife journal article supplement (doi:10.7554/elife.25141), 2017-09-11

**A**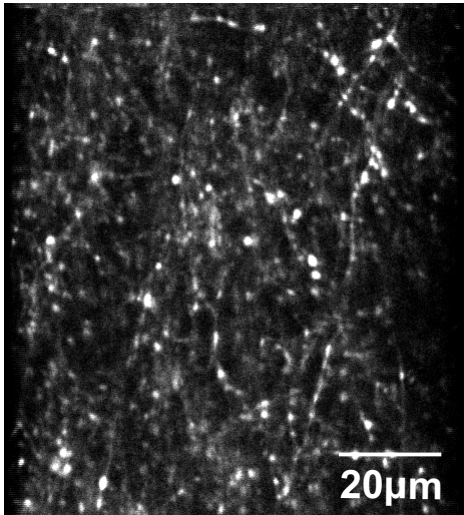**B**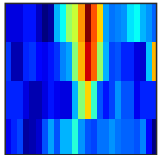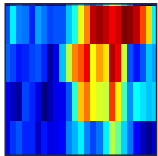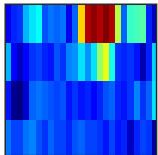

Supplement: supp [file elife-25141-supp-v1.zip]

**A**

Example FRAs and corresponding level-averaged tuning curves

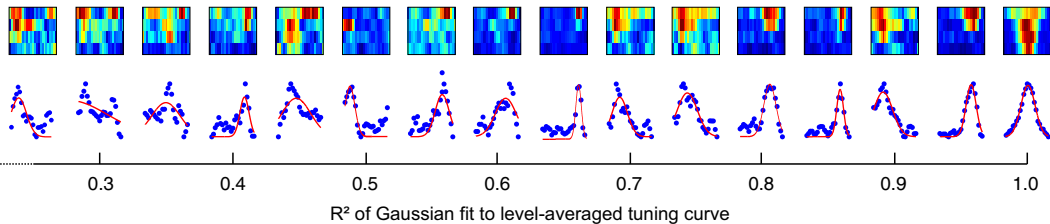**B**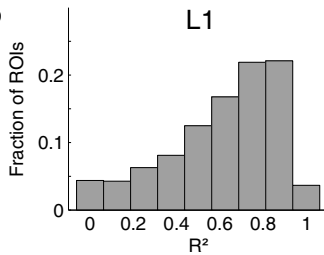**C**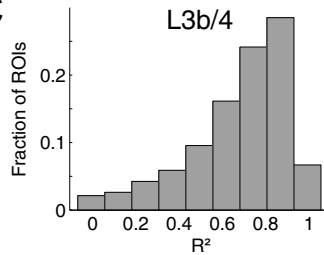

Supplement: supp [file elife-25141-supp-v1.zip]

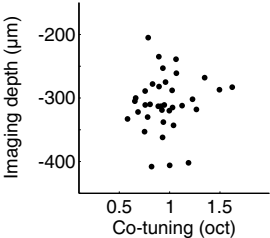

Supplement: supp [file elife-25141-supp-v1.zip]
